# Supplementary material for: The First Complete Genome Sequence of a Novel Tetrastichus brontispae RNA Virus-1 (TbRV-1)
Source: MDPI journal article supplement (doi:10.3390/v11030257), 2019-03-13
Supplement: s1 [file s1]

ASZ85160.1\_phosphoprotein\_Rhabdoviridae  
 sp|Q9E7N7|\_Phosphoprotein\_Lettuce\_necro  
 sp|P06747|PHOSP\_RABVP\_Phosphoprotein  
 sp|Q9E787|PHOSP\_BEVVB\_Phosphoprotein  
 sp|Q82681|PHOSP\_IHNVW\_Phosphoprotein  
 sp|Q6E0X0|PHOSP\_MMVR\_Phosphoprotein\_OS  
 sp|P03520|PHOSP\_VSIVA\_Phosphoprotein\_OS  
 gi|1070619313|ref|YP\_009301740.1|\_putat  
 TbRV\_1\_unnamed\_protein\_product

```

1      10      20      30      40
MLEGNEEIR...AL.....MAQYPELPTALDEVA AISREV.DAEDDYD....
MDESLEDFSSAD.TVI.....LRSPN.....AGTNP.....D.....
MSKI.FVNPS...AI.....RAGLADLEMAEETVDLINRNI.EDNQA...
.....MSHLKPKIMTGAYDAEKLRRNLQE QIALEEEDELENQTD FESNKEE
.....MSDGEQ.EQFF.....NLGE.....DILRLSRLKTPRND
MNRYSRRSRHP..NPP.....VP.....NQEEP.....E.....
..MDNLTKVR...EY.....LKSYSRLDQAVGEIDEIEAQR.AEKS...
MKQQNYIYPSMELRNL.TGPKKFFASGKGYLTKEYRNS..PFAEQGQLAVATNPRRTSWAMSDEE
MNPKEHLLNPKL.TRLINNKRVNVNSMINECFESTILPETIDNLEIDQIQMQKTPGN..W..DLQD

```

ASZ85160.1\_phosphoprotein\_Rhabdoviridae  
 sp|Q9E7N7|\_Phosphoprotein\_Lettuce\_necro  
 sp|P06747|PHOSP\_RABVP\_Phosphoprotein  
 sp|Q9E787|PHOSP\_BEVVB\_Phosphoprotein  
 sp|Q82681|PHOSP\_IHNVW\_Phosphoprotein  
 sp|Q6E0X0|PHOSP\_MMVR\_Phosphoprotein\_OS  
 sp|P03520|PHOSP\_VSIVA\_Phosphoprotein\_OS  
 gi|1070619313|ref|YP\_009301740.1|\_putat  
 TbRV\_1\_unnamed\_protein\_product

```

50      60      70
...LP.....S..DA..PRIDFDSDEDEDA....DE.....ADLDRPVSF....
...G.....HP.D..TV..ECPDFDTDIPKTS...DS.....SKMDNKGSSSSSK
...LQG.....E..PI..EVDNLPEDMGRHLH...DD.....GKSPNPGEM....
SNINNNP.LVIKQ..EP.SIY.....PIEINL.EDLEKAN.....GMEEDWENSL..MKIIESSDV
GQIGKNP.RRRKEDQAP.....QE EPKKTTRRP.....D..KNKGLSQLE
...R.....DP.N..HI.....DQ.....DL.....ADLAQPLVLK...
...LFQ.....E.D.G..VE..EHT.KPSYFQAADDSDTESEP.....EIEDNQGLYAQD.
GNIKD..LG...DAFQKE..LEQKHSSSDSDSQTSVSSN....DT.....VKMDPPP...PPP
SDIESDDDCILSQ..KG.KDFQL..ECDMFD...PKSVI.....QS.....THITNENHNDKPG

```

ASZ85160.1\_phosphoprotein\_Rhabdoviridae  
 sp|Q9E7N7|\_Phosphoprotein\_Lettuce\_necro  
 sp|P06747|PHOSP\_RABVP\_Phosphoprotein  
 sp|Q9E787|PHOSP\_BEVVB\_Phosphoprotein  
 sp|Q82681|PHOSP\_IHNVW\_Phosphoprotein  
 sp|Q6E0X0|PHOSP\_MMVR\_Phosphoprotein\_OS  
 sp|P03520|PHOSP\_VSIVA\_Phosphoprotein\_OS  
 gi|1070619313|ref|YP\_009301740.1|\_putat  
 TbRV\_1\_unnamed\_protein\_product

```

80      90
.....KVDWDQEEFKLDL.TSCSR.PLIQDFMK.....
AVKD.....L.LEL.AAKSQGIVVTDVMQ.....
..AKVGEGKYREDFQMD.E.GEDPS.LLFQSYLD.....
TPKL.....S.WNDEFENCT.....
QLIL.....K.YVE.EESC.....
...E.....R.HAV.MAPTQ.PSLSDVIN.....
..PE.....A.EQV.EGFIQ.GPLDDYADEEVDVVFTSDWKPPPELESDEHGKTLRLTSPEG
PEED.....M.IEL.VLPY.....
SSRK.....T.IEE.GEDQQ.....

```

ASZ85160.1\_phosphoprotein\_Rhabdoviridae  
 sp|Q9E7N7|\_Phosphoprotein\_Lettuce\_necro  
 sp|P06747|PHOSP\_RABVP\_Phosphoprotein  
 sp|Q9E787|PHOSP\_BEVVB\_Phosphoprotein  
 sp|Q82681|PHOSP\_IHNVW\_Phosphoprotein  
 sp|Q6E0X0|PHOSP\_MMVR\_Phosphoprotein\_OS  
 sp|P03520|PHOSP\_VSIVA\_Phosphoprotein\_OS  
 gi|1070619313|ref|YP\_009301740.1|\_putat  
 TbRV\_1\_unnamed\_protein\_product

```

100     110     120
...ETIVQLVSW.....INSKVPL.....GCGTFYCDSDK.EGE.....
...NTAIALHNNLGLDASSLDWFVAGITF.....ANNSMI...ME.KMV.SAIKE
...NVGVQIVRQ.....IRSGERF.....L..KIWS..QTVEEI.....
...YKGYVVS.....SEDLNDSGNQEKNEVPIKQS.....
...QDALKD.....FGGL..IANIRQAHQAEMTSH.....
...EERQ.....APITF.....GNPPEV...MANARL.SALGY
LSGSEQKSQWLST.....IKAVVQS.....AKYWNLAECTFEA.SGEGVIMKE
...MEIDLARK.....V.TEIDL.....ALKDLI...IDR.SL.PRIKY
...GAKIAKD.....MEKKLYLTKELSHLNPSVRTKLEFDMSKIKEEV.HTEVILMIQ

```

ASZ85160.1\_phosphoprotein\_Rhabdoviridae  
 sp|Q9E7N7|\_Phosphoprotein\_Lettuce\_necro  
 sp|P06747|PHOSP\_RABVP\_Phosphoprotein  
 sp|Q9E787|PHOSP\_BEVVB\_Phosphoprotein  
 sp|Q82681|PHOSP\_IHNVW\_Phosphoprotein  
 sp|Q6E0X0|PHOSP\_MMVR\_Phosphoprotein\_OS  
 sp|P03520|PHOSP\_VSIVA\_Phosphoprotein\_OS  
 gi|1070619313|ref|YP\_009301740.1|\_putat  
 TbRV\_1\_unnamed\_protein\_product

```

130     140     150
.....IRLIHKNYPNNSQLL...EELKE...LE...KS.....
LQIEVRNIQVASSGIK.G..TSEELVSKMKANKNDIV...KELVK...TR...DSVLSAMGG
.....ISYVAVNFPNPPGKS...SEDKS...TQ...TT...GR
.....SLE...DVAQ...VL...SL.....
.....LEK...VATE...HR.....
DNLTEREKRI LAVGVRG...EAAKDYHSLTTTKKWIEDELKSMVALASSTRTLTEAASLHTTFA
RQIT...ANLQ.ALTQ.....PDVYKVTPVMNTHPSQSEAV...SDVWS...LS...KT...
MMVPKPKEA.....T.....
S.....TLQ...PYSQ...LF...DL...D.FK

```

ASZ85160.1\_phosphoprotein\_Rhabdoviridae  
 sp|Q9E7N7|\_Phosphoprotein\_Lettuce\_necro  
 sp|P06747|PHOSP\_RABVP\_Phosphoprotein  
 sp|Q9E787|PHOSP\_BEVVB\_Phosphoprotein  
 sp|Q82681|PHOSP\_IHNVW\_Phosphoprotein  
 sp|Q6E0X0|PHOSP\_MMVR\_Phosphoprotein\_OS  
 sp|P03520|PHOSP\_VSIVA\_Phosphoprotein\_OS  
 gi|1070619313|ref|YP\_009301740.1|\_putat  
 TbRV\_1\_unnamed\_protein\_product

```

160     170     180
..LVETPAPSAPIR.EIDV.....RDR...KII.....IL.SR..SDDPP.....
IL...SAPEIEQQPVKVTIGASQGRRK...STVVPPIEIN.PE..LESPVL..SKTVSTA.TP
ELKK.ETTPPSQR.ESQS.....SKA...RMA...AQ.TA..SGPPALEWS...AT.NE
..FQIRSEVDYKIE.KDNK.....NQVKI IKLS...KQDKSVKSKRNDV.....V.NQ
.....ANLQ.ALTQ.....SQQEHEKVS...KEILSAVIAIRSN.....LNEN
ML...HSPSIKRKA...AM.SH..IS.QG..EESIDI..SKLNKTG.ME
...SMTFQPKKAS.....
PP...PPPLQP...PQET.....STP...PMQ...AQ.PS..TSMPKR..S...GPL.PP
V..NAPSATPETNIR.EQTI.....N.....HTA.....PSIETKAPEL..T...TL.QP

```

ASZ85160.1\_phosphoprotein\_Rhabdoviridae  
sp|Q9E7N7|\_Phosphoprotein\_Lettuce\_necro  
sp|P06747|PHOSP\_RABVP\_Phosphoprotein  
sp|Q9E787|PHOSP\_BEVVB\_Phosphoprotein  
sp|Q82681|PHOSP\_IHNVW\_Phosphoprotein  
sp|Q6E0X0|PHOSP\_MMVR\_Phosphoprotein\_OS  
sp|P03520|PHOSP\_VSIVA\_Phosphoprotein\_OS  
gi|1070619313|ref|YP\_009301740.1|\_putat  
TbRV\_1\_unnamed\_protein\_product

190

WTG.TLVQLA GSREKAHNP  
EERIRH..EKEKLLAD..LDWEIGE I...AQYTPL...IV..DFLVP..DDIL...  
EDDL SV..EAEIA.HQIAE.SFSKKYKFPSRSSGILLYNFEQL..KMNL...DDIVKEAKNV  
DSDKHKMYDSNFDAM..D.QFQKG IRIKKRFGKGY.VKINA.DNMPGT.Y.HDLSNVIS..  
HSPLP.KPLDPDQVKAARA..L.GFGIGYRTALNVFDR..IKGVTPDNAGSQ.EVKNL..AIR..  
DIWVAM..EESKEDA..VDTYLRN I...LEVDP TQ..FYAID..GWGLY..LDFIPTWH..  
L..Q.PLTIS L D.ELFSSRGEF...I..  
TESTSR..ERERSALV..V.EFMKG V KLVGIEPEQTYTLKIG..VGGVT..EDLI..  
TNVTTK...LQ.KEWL..T.KLKKG I KCKSRSEENEYYSPKID..NKNIKE.SDVSNCLQ..

200 210 220 230 240

ASZ85160.1\_phosphoprotein\_Rhabdoviridae  
sp|Q9E7N7|\_Phosphoprotein\_Lettuce\_necro  
sp|P06747|PHOSP\_RABVP\_Phosphoprotein  
sp|Q9E787|PHOSP\_BEVVB\_Phosphoprotein  
sp|Q82681|PHOSP\_IHNVW\_Phosphoprotein  
sp|Q6E0X0|PHOSP\_MMVR\_Phosphoprotein\_OS  
sp|P03520|PHOSP\_VSIVA\_Phosphoprotein\_OS  
gi|1070619313|ref|YP\_009301740.1|\_putat  
TbRV\_1\_unnamed\_protein\_product

DFN.....STTPVVD MVIW.ALMQ GKQYNRF ALR Y QIEEAEF...DEED.....D  
A.M.AADGLTPEL.....KEKI ONE I IENHIAL.M AL.EE.....YS.S  
PGVTRL.ARDGSKLPLRCVLGWALAN...SKK..FQL LVESNKL SK I M.QDDLNR..YTSC  
TV.....KGEKT.....VEEM IRY LFKKSKRFKS I N.KTLNIDEMIL.C  
AA.EED.EYEGSPTF.....FRKV I DAVKKRMK.....QG.....Q  
Y.I.AAGKNSAQF.....KTSY ADE I VEQRAAFER VLSKR.PR...VE.I  
S.VGGDGRMSHKE.....A I LGLR.YKKLYNQ AR.VK.....YS.L  
N.EVNEQGLDQP.....TQEF I EN L LCRLEYGQT L H.SL.....YELA  
IL.....TLNN.....KEEV M FN I LSLHPQVRQ L A.AMFVLP..LN.L
